# Supplementary material
Source: PubMed Central journal article supplement (PMC4038992)
Supplement: Supp_Table1A.pdf [file Supp_Table1A.pdf]

## Supplementary Data

**Supplementary Table 1A. SEM Models of zBMI and PEP Reactivity with Anthropometric Covariates**

| SEM models (DV; IV)                               | B     | 95% CI of B  | p value | SE (B) | Z     | $\beta$ (STD) |
|---------------------------------------------------|-------|--------------|---------|--------|-------|---------------|
| Cross-sectional models                            |       |              |         |        |       |               |
| PEP reactivity at 3.5 years and zBMI at 3.5 years | 0.05  | -0.17, 0.26  | 0.68    | 0.11   | 0.41  | 0.04          |
| PEP reactivity at 5 years and zBMI at 5 years     | -0.06 | -0.22, 0.10  | 0.44    | 0.08   | -0.77 | -0.09         |
| Longitudinal models                               |       |              |         |        |       |               |
| zBMI at 2 years (DV)                              |       |              |         |        |       |               |
| Prenatal BMI (IV)                                 | 0.03  | 0.00, 0.06   | 0.05    | 0.01   | 1.98  | 0.13          |
| zBMI at 3.5 years (DV)                            |       |              |         |        |       |               |
| Prenatal BMI                                      | 0.03  | -0.001, 0.05 | 0.06    | 0.01   | 1.87  | 0.13          |
| zBMI at 2 years*                                  | 0.59  | 0.47, 0.71   | 0.00    | 0.06   | 9.99  | 0.69          |
| Height change 2-3.5 years                         | 0.04  | -0.02, 0.10  | 0.18    | 0.03   | 1.33  | 0.11          |
| zBMI at 5 years (DV)                              |       |              |         |        |       |               |
| Prenatal BMI                                      | 0.02  | -0.002, 0.03 | 0.08    | 0.01   | 1.74  | 0.09          |
| zBMI at 3.5 years*                                | 0.75  | 0.68, 0.83   | 0.00    | 0.04   | 19.05 | 0.82          |
| Height change 3.5-5 years                         | -0.01 | -0.06, 0.05  | 0.82    | 0.03   | -0.23 | -0.02         |
| PEP reactivity at 3.5 years                       | -0.01 | -0.06, 0.04  | 0.69    | 0.03   | -0.41 | -0.02         |
| PEP reactivity at 3.5 years (DV)                  |       |              |         |        |       |               |
| BMI at 2 years                                    | 0.004 | -0.23, 0.24  | 0.97    | 0.12   | 0.03  | 0.04          |
| PEP reactivity at 5 years (DV)                    |       |              |         |        |       |               |
| PEP reactivity at 3.5 years                       | 0.01  | -0.14, 0.16  | 0.90    | 0.08   | 0.13  | 0.01          |
| zBMI at 2 years*                                  | -0.42 | -0.78, -0.06 | 0.02    | 0.18   | -2.28 | -0.33         |
| zBMI at 3.5 years*                                | 0.61  | 0.17, 1.04   | 0.01    | 0.22   | 2.72  | 0.41          |

$n = 112$ . Global model fit results:  $\chi^2 (df) = 23.04 (11)$ ;  $p = 0.02$ ; comparative fit index (CFI) = 0.95; root mean square error of approximation (RMSEA) = 0.10; standardized root mean square residual (SRMR) = 0.07. Estimates obtained from *Mplus* 6.12 by maximum likelihood with robust standard errors (*Mplus* estimator MLR). B = unstandardized regression coefficient;  $\beta$  = standardized regression coefficient; SE (B) = standard error of B; Z = B/SE (B);  $p$  = probability value associated with the null hypothesis that B = 0 in the population. For bidirectional cross-sectional relationships denoted by "with" in the table, B may be interpreted as a covariance and  $\beta$  interpreted as a correlation.

\* $p < 0.05$ .

SEM, structural equation modeling; zBMI, standardized BMI; PEP, pre-ejection period; DV, dependent variable; IV, independent variable; CI, confidence interval; SE, standard error; SD, standard deviation.
