# Supplementary material
Source: PubMed Central journal article supplement (PMC4038992)
Supplement: Supp_Table1B.pdf [file Supp_Table1B.pdf]

## Supplementary Table 1B. zBMI Change and PEP Reactivity with Anthropometric Covariates

| SEM models (DV; IV)                                     | B     | 95% CI of B | p value | SE (B) | Z     | $\beta$ (STD) |
|---------------------------------------------------------|-------|-------------|---------|--------|-------|---------------|
| Cross-sectional models                                  |       |             |         |        |       |               |
| PEP reactivity at 3.5 years and zBMI change 2–3.5 years | 0.01  | –0.23, 0.26 | 0.92    | 0.12   | 0.10  | 0.01          |
| PEP reactivity at 5 years and zBMI change 3.5–5 years   | –0.11 | –0.29, 0.06 | 0.21    | 0.09   | –1.26 | –0.15         |
| Longitudinal models                                     |       |             |         |        |       |               |
| zBMI change from 2–3.5 years (DV)                       |       |             |         |        |       |               |
| Prenatal BMI (IV)                                       | 0.02  | –0.01, 0.04 | 0.25    | 0.01   | 1.15  | 0.10          |
| Height change 2–3.5 years                               | 0.002 | –0.07, 0.07 | 0.97    | 0.04   | 0.04  | 0.01          |
| zBMI change from 3.5 to 5 years (DV)                    |       |             |         |        |       |               |
| Prenatal BMI                                            | 0.01  | –0.01, 0.02 | 0.50    | 0.01   | 0.68  | 0.06          |
| zBMI change 2–3.5 years                                 | –0.10 | –0.22, 0.02 | 0.11    | 0.06   | –1.61 | –0.15         |
| Height change 3.5–5 years                               | –0.02 | –0.07, 0.04 | 0.58    | 0.03   | –0.55 | –0.06         |
| PEP reactivity at 3.5 years                             | –0.02 | –0.07, 0.04 | 0.59    | 0.03   | –0.54 | –0.05         |
| PEP reactivity at 5 years (DV)                          |       |             |         |        |       |               |
| PEP reactivity at 3.5 years                             | 0.01  | –0.14, 0.16 | 0.90    | 0.08   | 0.12  | 0.01          |
| zBMI change 2–3.5 years*                                | 0.48  | 0.12, 0.84  | 0.01    | 0.19   | 2.59  | 0.27          |

$n = 112$ . Global model fit results:  $\chi^2$  ( $df$ ) = 8.10 (5);  $p = 0.15$ ; comparative fit index (CFI) = 0.62; root mean square error of approximation (RMSEA) = 0.07; standardized root mean square residual (SRMR) = 0.04. Estimates obtained from *Mplus* 6.12 by maximum likelihood with robust standard errors (*Mplus* estimator MLR). B = unstandardized regression coefficient;  $\beta$  = standardized regression coefficient; SE (B) = standard error of B; Z = B/SE (B);  $p$  = probability value associated with the null hypothesis that B = 0 in the population. For bidirectional cross-sectional relationships denoted by “with” in the table, B may be interpreted as a covariance and  $\beta$  interpreted as a correlation.

\* $p < 0.05$ .

zBMI, standardized BMI; SEM, structural equation modeling; DV, dependent variable; IV, independent variable; CI, confidence interval; SE, standard error; SD, standard deviation.
